# Supplementary material
Source: publisher figshare collection journal article supplement (https://diabetesjournals.figshare.com/articles/dataset/_/20350242)
Supplement: Supplementary file 1 [file 1]

## **Appendix, Figure 1. Trial Profile**

### **Appendix: Insulin Protocol**

#### **Insulin initiation and titration protocol**

##### **Insulin Naïve T2D Patients Treated with Oral Agents or GLP1-RA Prior to Admission**

- Discontinue antidiabetic drugs
- Starting total daily insulin dose (TDD):
  - 0.4 U/Kg/day when randomization BG between 140-200 mg/dL
  - 0.5 U/Kg/day when randomization BG between 201-400 mg/dL
  - TDD was reduced to 0.3 U/Kg/day in patients  $\geq 70$  years of age and/or with an eGFR  $< 60$  ml/min.
- Half of TDD was given as basal insulin and half as rapid-acting insulin.
- Basal insulin was given once daily, at the same time of the day.
- Rapid-acting insulin was given in three equally divided doses before meals.
- To prevent hypoglycemia, if a subject was not able to eat, prandial insulin dose was held.

##### **Patients T2D Treated with Insulin Prior to Admission**

- Discontinue antidiabetic drugs
- Subjects treated with insulin prior to admission received 80% of the total daily dose (TDD) given as basal bolus regimen.
  - Half of TDD were given as basal insulin and half as rapid-acting insulin.
  - Basal insulin was given once daily, at the same time of the day.
  - Rapid-acting insulin was given in three equally divided doses before meals.
  - To prevent hypoglycemia, if a subject was not able to eat, prandial insulin was held.

## Insulin Titration Protocol

Standard of care group: insulin adjustment was based on point of care capillary glucose values on the previous 24 hours.

CGM group: insulin adjustment was based on the previous 24-hour CGM glucose profile.

### Basal Insulin adjustment.

- Daily basal insulin dose was adjusted as following:
  - If the fasting and pre-dinner glucose values were between 100 - 140 mg/dl in the absence of hypoglycemia the previous day: no change
  - If the fasting and pre-dinner glucose values were between 141 - 200 mg/dl in the absence of hypoglycemia: increased basal insulin by 10% every day
  - If the fasting and pre-dinner glucose values were between 201 - 280 mg/dl in the absence of hypoglycemia: increased basal insulin by 20% every day
  - If the fasting and pre-dinner glucose values were >281 mg/dl in the absence of hypoglycemia the previous day: increased basal insulin (glargine) dose by 30% every day
  - If the fasting and pre-dinner glucose values were between 70 - 99 mg/dl in the absence of hypoglycemia: decreased TDD (basal and prandial) insulin dose by 10% every day
  - If glucose values were <70 mg/dL, the insulin TDD (basal and prandial) decreased by 20%.
  - If glucose values were <40 mg/dL, the insulin TDD (basal and prandial) decreased by 30-40%.

### Supplemental/correction insulin protocol:

- If a patient was able and expected to eat most of his/her meals, supplemental insulin was administered before meals and at bedtime following the “usual” dose of the insulin scale protocol.
- If a patient was not able to eat, supplemental insulin was administered every 6 hours following the “sensitive” dose of the supplemental insulin scale protocol.
- Table indicates number of units to be added to scheduled insulin dose.

**BEFORE MEAL, Supplemental Sliding Scale Insulin (number of units) - Add to scheduled insulin dose.**

**\*\*Check appropriate column and cross out other columns**

| <b>*BG (mg/dL)</b> | <input type="checkbox"/> <b>Insulin Sensitive</b> | <input type="checkbox"/> <b>Usual</b> | <input type="checkbox"/> <b>Insulin Resistant</b> |
|--------------------|---------------------------------------------------|---------------------------------------|---------------------------------------------------|
| < 141              | No sliding scale (supplemental)insulin            |                                       |                                                   |
| 141 – 180          | 2                                                 | 3                                     | 4                                                 |

|           |   |    |    |
|-----------|---|----|----|
| 181 – 220 | 3 | 4  | 6  |
| 221 – 260 | 4 | 5  | 8  |
| 261 – 300 | 5 | 6  | 10 |
| 301 – 350 | 6 | 8  | 12 |
| 351 – 400 | 7 | 10 | 14 |
| > 400     | 8 | 12 | 16 |

**BEDTIME Supplemental Sliding Scale for BG > 220 mg/dL**

**\*BG (mg/dL)**      ☐ **Insulin Sensitive**      ☐ **Usual**      ☐ **Insulin Resistant**

|           |                                         |   |   |
|-----------|-----------------------------------------|---|---|
| < 220     | No sliding scale (supplemental) insulin |   |   |
| 221 – 260 | 1                                       | 2 | 4 |
| 261 – 300 | 2                                       | 3 | 5 |
| 301 – 350 | 3                                       | 4 | 6 |
| 351 – 400 | 4                                       | 5 | 7 |
| > 400     | 5                                       | 6 | 8 |

\*BG by POCT will be used in the standard of care group and CGM values at time of insulin administration will be used for those in the Dexcom CGM group.
